# Supplementary material
Source: PubMed Central journal article supplement (PMC545087)
Supplement: pnas_102_5_1779__1.pdf [file pnas_102_5_1779__1.pdf]

|   |   |   |    |                      |
|---|---|---|----|----------------------|
| 1 | 1 | 1 | 1  | p12c89_sbhmngt#1     |
| 1 | 1 | 1 | 2  | p12c90_aaa32785#1    |
| 1 | 1 | 1 | 3  | p12c91_aaa82888#1    |
| 1 | 1 | 1 | 4  | p12c92_aab37098#1    |
| 1 | 1 | 1 | 5  | p12c93_aab70035#1    |
| 1 | 1 | 1 | 6  | p12c94_aab95308#1    |
| 1 | 1 | 1 | 7  | p12c95_aac04865#1    |
| 1 | 1 | 1 | 8  | p12c96_aac04900#1    |
| 1 | 1 | 1 | 9  | p12c81_aaf18250#1    |
| 1 | 1 | 1 | 10 | p12c82_aaf23561#1    |
| 1 | 1 | 1 | 11 | p12c83_aaf32299#1    |
| 1 | 1 | 1 | 12 | p12c84_aag28813#1    |
| 1 | 1 | 2 | 1  | p12c85_aag38877#1    |
| 1 | 1 | 2 | 2  | p12c86_aag50662#1    |
| 1 | 1 | 2 | 3  | p12c87_aag51148#1    |
| 1 | 1 | 2 | 4  | p12c88_aak43477#1    |
| 1 | 1 | 2 | 5  | p12c73_bab08760#1    |
| 1 | 1 | 2 | 6  | p12c74_bab08859#1    |
| 1 | 1 | 2 | 7  | p12c75_bab10427#1    |
| 1 | 1 | 2 | 8  | p12c76_bab11669#1    |
| 1 | 1 | 2 | 9  | p12c77_caa23025#1    |
| 1 | 1 | 2 | 10 | p12c78_caa23064#1    |
| 1 | 1 | 2 | 11 | p12c79_caa73905#1    |
| 1 | 1 | 2 | 12 | p12c80_cab43691#1    |
| 1 | 1 | 3 | 1  | p12c65_cyp701a3_ntc# |
| 1 | 1 | 3 | 2  | p12c66_cyp702a2_ntc# |
| 1 | 1 | 3 | 3  | p12c67_cyp702a5_ntc# |
| 1 | 1 | 3 | 4  | p12c68_cyp702a8_ntc# |
| 1 | 1 | 3 | 5  | p12c69_cyp704a1_ntc# |
| 1 | 1 | 3 | 6  | p12c70_cyp704b1_ntc# |
| 1 | 1 | 3 | 7  | p12c71_cyp705a13_ntc |
| 1 | 1 | 3 | 8  | p12c72_cyp705a16_ntc |
| 1 | 1 | 3 | 9  | p12c57_cyp705a5_ntc# |
| 1 | 1 | 3 | 10 | p12c58_cyp705a8_ntc# |
| 1 | 1 | 3 | 11 | p12c59_cyp706a1_ntc# |
| 1 | 1 | 3 | 12 | p12c60_cyp706a3_ntc# |
| 1 | 1 | 4 | 1  | p12c61_cyp706a5_ntc# |
| 1 | 1 | 4 | 2  | p12c62_cyp706a7_ntc# |
| 1 | 1 | 4 | 3  | p12c63_cyp707a2_ntc# |
| 1 | 1 | 4 | 4  | p12c64_cyp707a4_ntc# |
| 1 | 1 | 4 | 5  | p12c49_cyp714a2_ntc# |
| 1 | 1 | 4 | 6  | p12c50_cyp716a1_ntc# |
| 1 | 1 | 4 | 7  | p12c51_cyp718_ntc#1  |
| 1 | 1 | 4 | 8  | p12c52_cyp71a13_ntc# |
| 1 | 1 | 4 | 9  | p12c53_cyp71a15_ntc# |
| 1 | 1 | 4 | 10 | p12c54_cyp71a18_ntc# |
| 1 | 1 | 4 | 11 | p12c55_cyp71a20_ntc# |
| 1 | 1 | 4 | 12 | p12c56_cyp71a22_ntc# |

|   |   |   |    |                      |
|---|---|---|----|----------------------|
| 1 | 1 | 5 | 1  | p12c41_cyp71b21_ntc# |
| 1 | 1 | 5 | 2  | p12c42_cyp71b23_ntc# |
| 1 | 1 | 5 | 3  | p12c43_cyp71b25_ntc# |
| 1 | 1 | 5 | 4  | p12c44_cyp71b28_ntc# |
| 1 | 1 | 5 | 5  | p12c45_cyp71b2_ntc#1 |
| 1 | 1 | 5 | 6  | p12c46_gapdh         |
| 1 | 1 | 5 | 7  | p12c47_cyp71b32_ntc# |
| 1 | 1 | 5 | 8  | p12c48_cyp71b34_ntc# |
| 1 | 1 | 5 | 9  | p12c33_cyp72a13_ntc# |
| 1 | 1 | 5 | 10 | p12c34_cyp72a15_ntc# |
| 1 | 1 | 5 | 11 | p12c35_cyp72a8_ntc#1 |
| 1 | 1 | 5 | 12 | p12c36_cyp72b1_ntc#1 |
| 1 | 1 | 6 | 1  | p12c37_cyp73a5_ntc#1 |
| 1 | 1 | 6 | 2  | p12c38_cyp74b2_ntc#1 |
| 1 | 1 | 6 | 3  | p12c39_cyp76c1_ntc#1 |
| 1 | 1 | 6 | 4  | p12c40_cyp76c3_ntc#1 |
| 1 | 1 | 6 | 5  | p12c25_cyp79b2_ntc#1 |
| 1 | 1 | 6 | 6  | p12c26_cyp79c1_ntc#1 |
| 1 | 1 | 6 | 7  | p12c27_cyp79f1_ntc#1 |
| 1 | 1 | 6 | 8  | p12c28_cyp81d11_ntc# |
| 1 | 1 | 6 | 9  | p12c29_cyp81d2_ntc#1 |
| 1 | 1 | 6 | 10 | p12c30_cyp81d4_ntc#1 |
| 1 | 1 | 6 | 11 | p12c31_cyp81d6_ntc#1 |
| 1 | 1 | 6 | 12 | p12c32_cyp81d8_ntc#1 |
| 1 | 1 | 7 | 1  | p12c17_cyp85a2_ntc#1 |
| 1 | 1 | 7 | 2  | p12c18_cyp86a2_ntc#1 |
| 1 | 1 | 7 | 3  | p12c19_cyp86a7_ntc#1 |
| 1 | 1 | 7 | 4  | p12c20_cyp86b1_ntc#1 |
| 1 | 1 | 7 | 5  | p12c21_cyp86c1_ntc#1 |
| 1 | 1 | 7 | 6  | p12c22_cyp86c3_ntc#1 |
| 1 | 1 | 7 | 7  | p12c23_cyp87a2_ntc#1 |
| 1 | 1 | 7 | 8  | p12c24_cyp88a4_ntc#1 |
| 1 | 1 | 7 | 9  | p12c9_cyp94d2_ntc#1  |
| 1 | 1 | 7 | 10 | p12c10_cyp96a11_ntc# |
| 1 | 1 | 7 | 11 | p12c11_cyp96a13_ntc# |
| 1 | 1 | 7 | 12 | p12c12_cyp96a1_ntc#1 |
| 1 | 1 | 8 | 1  | p12c13_cyp96a3_ntc#1 |
| 1 | 1 | 8 | 2  | p12c14_cyp96a5_ntc#1 |
| 1 | 1 | 8 | 3  | p12c15_cyp96a8_ntc#1 |
| 1 | 1 | 8 | 4  | p12c16_cyp97a3_ntc#1 |
| 1 | 1 | 8 | 5  | p12c1_ugt71b8_ntc#1  |
| 1 | 1 | 8 | 6  | p12c2_ugt71c2_ntc#1  |
| 1 | 1 | 8 | 7  | p12c3_ugt71c4_ntc#1  |
| 1 | 1 | 8 | 8  | p12c4_ugt71d1_ntc#1  |
| 1 | 1 | 8 | 9  | p12c5_ugt72b1_ntc#1  |
| 1 | 1 | 8 | 10 | p12c6_ugt72b3_ntc#1  |
| 1 | 1 | 8 | 11 | p12c7_ugt72d1_ntc#1  |
| 1 | 1 | 8 | 12 | p12c8_ugt72e1_ntc#1  |

|   |   |    |    |                      |
|---|---|----|----|----------------------|
| 1 | 1 | 9  | 1  | p22c89_ugt74d1_ntc#1 |
| 1 | 1 | 9  | 2  | p22c90_ugt74e2_ntc#1 |
| 1 | 1 | 9  | 3  | p22c91_ugt74f2_ntc#1 |
| 1 | 1 | 9  | 4  | p22c92_ugt75b2_ntc#1 |
| 1 | 1 | 9  | 5  | p22c93_ugt75d1_ntc#1 |
| 1 | 1 | 9  | 6  | p22c94_ugt76c1_ntc#1 |
| 1 | 1 | 9  | 7  | p22c95_ugt76c3_ntc#1 |
| 1 | 1 | 9  | 8  | p22c96_ugt76c5_ntc#1 |
| 1 | 1 | 9  | 9  | p22c81_ugt78d3_ntc#1 |
| 1 | 1 | 9  | 10 | p22c82_ugt79b11_ntc# |
| 1 | 1 | 9  | 11 | p22c83_ugt79b2_ntc#1 |
| 1 | 1 | 9  | 12 | p22c84_ugt79b5_ntc#1 |
| 1 | 1 | 10 | 1  | p22c85_ugt79b7_ntc#1 |
| 1 | 1 | 10 | 2  | p22c86_ugt79b9_ntc#1 |
| 1 | 1 | 10 | 3  | p22c87_ugt83a1_ntc#1 |
| 1 | 1 | 10 | 4  | p22c88_ugt84a2_ntc#1 |
| 1 | 1 | 10 | 5  | p22c73_ugt89c1_ntc#1 |
| 1 | 1 | 10 | 6  | p22c74_ugt90a2_ntc#1 |
| 1 | 1 | 10 | 7  | p22c75_Blank1        |
| 1 | 1 | 10 | 8  | p22c76_Blank3        |
| 1 | 1 | 10 | 9  | p22c77_Blank5        |
| 1 | 1 | 10 | 10 | p22c78_Blank7        |
| 1 | 1 | 10 | 11 | p22c79_Blank9        |
| 1 | 1 | 10 | 12 | p22c80_Blank11       |
| 1 | 2 | 1  | 1  | p14c89_aaa32784#1    |
| 1 | 2 | 1  | 2  | p14c90_aaa60380#1    |
| 1 | 2 | 1  | 3  | p14c91_aab02913#1    |
| 1 | 2 | 1  | 4  | p14c92_aab60293#1    |
| 1 | 2 | 1  | 5  | p14c93_aab80641#1    |
| 1 | 2 | 1  | 6  | p14c94_aab95309#1    |
| 1 | 2 | 1  | 7  | p14c95_aac04866#1    |
| 1 | 2 | 1  | 8  | p14c96_aac16744#1    |
| 1 | 2 | 1  | 9  | p14c81_aaf22898#1    |
| 1 | 2 | 1  | 10 | p14c82_aaf26137#1    |
| 1 | 2 | 1  | 11 | p14c83_aaf87896#1    |
| 1 | 2 | 1  | 12 | p14c84_aag37061#1    |
| 1 | 2 | 2  | 1  | p14c85_aag40089#1    |
| 1 | 2 | 2  | 2  | p14c86_aag50869#1    |
| 1 | 2 | 2  | 3  | p14c87_aag51444#1    |
| 1 | 2 | 2  | 4  | p14c88_aak49620#1    |
| 1 | 2 | 2  | 5  | p14c73_bab08811#1    |
| 1 | 2 | 2  | 6  | p14c74_bab09667#1    |
| 1 | 2 | 2  | 7  | p14c75_bab10727#1    |
| 1 | 2 | 2  | 8  | p14c76_caa22980#1    |
| 1 | 2 | 2  | 9  | p14c77_caa23026#1    |
| 1 | 2 | 2  | 10 | p14c78_caa29828#1    |
| 1 | 2 | 2  | 11 | p14c79_cab41936#1    |
| 1 | 2 | 2  | 12 | p14c80_cab54518#1    |

|   |   |   |    |                      |
|---|---|---|----|----------------------|
| 1 | 2 | 3 | 1  | p14c65_cyp702a1_ntc# |
| 1 | 2 | 3 | 2  | p14c66_cyp702a3_ntc# |
| 1 | 2 | 3 | 3  | p14c67_cyp702a6_ntc# |
| 1 | 2 | 3 | 4  | p14c68_cyp703a2_ntc# |
| 1 | 2 | 3 | 5  | p14c69_cyp704a2_ntc# |
| 1 | 2 | 3 | 6  | p14c70_cyp705a12_ntc |
| 1 | 2 | 3 | 7  | p14c71_cyp705a15_ntc |
| 1 | 2 | 3 | 8  | p14c72_cyp705a18_ntc |
| 1 | 2 | 3 | 9  | p14c57_cyp705a6_ntc# |
| 1 | 2 | 3 | 10 | p14c58_cyp705a9_ntc# |
| 1 | 2 | 3 | 11 | p14c59_cyp706a2_ntc# |
| 1 | 2 | 3 | 12 | p14c60_cyp706a4_ntc# |
| 1 | 2 | 4 | 1  | p14c61_cyp706a6_ntc# |
| 1 | 2 | 4 | 2  | p14c62_cyp707a1_ntc# |
| 1 | 2 | 4 | 3  | p14c63_cyp707a3_ntc# |
| 1 | 2 | 4 | 4  | p14c64_cyp708a1_ntc# |
| 1 | 2 | 4 | 5  | p14c49_cyp715a1_ntc# |
| 1 | 2 | 4 | 6  | p14c50_cyp716a2_ntc# |
| 1 | 2 | 4 | 7  | p14c51_cyp71a12_ntc# |
| 1 | 2 | 4 | 8  | p14c52_cyp71a14_ntc# |
| 1 | 2 | 4 | 9  | p14c53_cyp71a16_ntc# |
| 1 | 2 | 4 | 10 | p14c54_cyp71a19_ntc# |
| 1 | 2 | 4 | 11 | p14c55_cyp71a21_ntc# |
| 1 | 2 | 4 | 12 | p14c56_cyp71a23_ntc# |
| 1 | 2 | 5 | 1  | p14c41_cyp71b22_ntc# |
| 1 | 2 | 5 | 2  | p14c42_cyp71b24_ntc# |
| 1 | 2 | 5 | 3  | p14c43_cyp71b26_ntc# |
| 1 | 2 | 5 | 4  | p14c44_cyp71b29_ntc# |
| 1 | 2 | 5 | 5  | p14c45_cyp71b31_ntc# |
| 1 | 2 | 5 | 6  | p14c46_gapdh         |
| 1 | 2 | 5 | 7  | p14c47_cyp71b33_ntc# |
| 1 | 2 | 5 | 8  | p14c48_cyp71b35_ntc# |
| 1 | 2 | 5 | 9  | p14c33_cyp72a14_ntc# |
| 1 | 2 | 5 | 10 | p14c34_cyp72a7_ntc#1 |
| 1 | 2 | 5 | 11 | p14c35_cyp72a9_ntc#1 |
| 1 | 2 | 5 | 12 | p14c36_cyp72c1_ntc#1 |
| 1 | 2 | 6 | 1  | p14c37_cyp74a_ntc#1  |
| 1 | 2 | 6 | 2  | p14c38_cyp75b1_ntc#1 |
| 1 | 2 | 6 | 3  | p14c39_cyp76c2_ntc#1 |
| 1 | 2 | 6 | 4  | p14c40_cyp76c4_ntc#1 |
| 1 | 2 | 6 | 5  | p14c25_cyp79b3_ntc#1 |
| 1 | 2 | 6 | 6  | p14c26_cyp79c2_ntc#1 |
| 1 | 2 | 6 | 7  | p14c27_cyp79f2_ntc#1 |
| 1 | 2 | 6 | 8  | p14c28_cyp81d1_ntc#1 |
| 1 | 2 | 6 | 9  | p14c29_cyp81d3_ntc#1 |
| 1 | 2 | 6 | 10 | p14c30_cyp81d5_ntc#1 |
| 1 | 2 | 6 | 11 | p14c31_cyp81d7_ntc#1 |
| 1 | 2 | 6 | 12 | p14c32_cyp81f1_ntc#1 |

|   |   |    |    |                      |
|---|---|----|----|----------------------|
| 1 | 2 | 7  | 1  | p14c17_cyp86a1_ntc#1 |
| 1 | 2 | 7  | 2  | p14c18_cyp86a4_ntc#1 |
| 1 | 2 | 7  | 3  | p14c19_cyp86a8_ntc#1 |
| 1 | 2 | 7  | 4  | p14c20_cyp86b2_ntc#1 |
| 1 | 2 | 7  | 5  | p14c21_cyp86c2_ntc#1 |
| 1 | 2 | 7  | 6  | p14c22_cyp86c4_ntc#1 |
| 1 | 2 | 7  | 7  | p14c23_cyp88a3_ntc#1 |
| 1 | 2 | 7  | 8  | p14c24_cyp89a2_ntc#1 |
| 1 | 2 | 7  | 9  | p14c9_cyp96a10_ntc#1 |
| 1 | 2 | 7  | 10 | p14c10_cyp96a12_ntc# |
| 1 | 2 | 7  | 11 | p14c11_cyp96a15_ntc# |
| 1 | 2 | 7  | 12 | p14c12_cyp96a2_ntc#1 |
| 1 | 2 | 8  | 1  | p14c13_cyp96a4_ntc#1 |
| 1 | 2 | 8  | 2  | p14c14_cyp96a7_ntc#1 |
| 1 | 2 | 8  | 3  | p14c15_cyp96a9_ntc#1 |
| 1 | 2 | 8  | 4  | p14c16_cyp97b3_ntc#1 |
| 1 | 2 | 8  | 5  | p14c1_ugt71c1_ntc#1  |
| 1 | 2 | 8  | 6  | p14c2_ugt71c3_ntc#1  |
| 1 | 2 | 8  | 7  | p14c3_ugt71c5_ntc#1  |
| 1 | 2 | 8  | 8  | p14c4_ugt71d2_ntc#1  |
| 1 | 2 | 8  | 9  | p14c5_ugt72b2_ntc#1  |
| 1 | 2 | 8  | 10 | p14c6_ugt72c1_ntc#1  |
| 1 | 2 | 8  | 11 | p14c7_ugt72d2#1      |
| 1 | 2 | 8  | 12 | p14c8_ugt72e2_ntc#1  |
| 1 | 2 | 9  | 1  | p24c89_ugt74e1_ntc#1 |
| 1 | 2 | 9  | 2  | p24c90_ugt74f1_ntc#1 |
| 1 | 2 | 9  | 3  | p24c91_ugt75b1_ntc#1 |
| 1 | 2 | 9  | 4  | p24c92_ugt75c1_ntc#1 |
| 1 | 2 | 9  | 5  | p24c93_ugt76b1_ntc#1 |
| 1 | 2 | 9  | 6  | p24c94_ugt76c2_ntc#1 |
| 1 | 2 | 9  | 7  | p24c95_ugt76c4_ntc#1 |
| 1 | 2 | 9  | 8  | p24c96_ugt76d1_ntc#1 |
| 1 | 2 | 9  | 9  | p24c81_ugt79b10_ntc# |
| 1 | 2 | 9  | 10 | p24c82_ugt79b1_ntc#1 |
| 1 | 2 | 9  | 11 | p24c83_ugt79b4_ntc#1 |
| 1 | 2 | 9  | 12 | p24c84_ugt79b6_ntc#1 |
| 1 | 2 | 10 | 1  | p24c85_ugt79b8_ntc#1 |
| 1 | 2 | 10 | 2  | p24c86_ugt82a1_ntc#1 |
| 1 | 2 | 10 | 3  | p24c87_ugt84a1_ntc#1 |
| 1 | 2 | 10 | 4  | p24c88_ugt84a3_ntc#1 |
| 1 | 2 | 10 | 5  | p24c73_ugt90a1_ntc#1 |
| 1 | 2 | 10 | 6  | p24c74_ugt90a4_ntc#1 |
| 1 | 2 | 10 | 7  | p24c75_Blank2        |
| 1 | 2 | 10 | 8  | p24c76_Blank4        |
| 1 | 2 | 10 | 9  | p24c77_Blank6        |
| 1 | 2 | 10 | 10 | p24c78_Blank8        |
| 1 | 2 | 10 | 11 | p24c79_Blank10       |
| 1 | 2 | 10 | 12 | p24c80_Blank12       |

|   |   |   |    |                      |
|---|---|---|----|----------------------|
| 2 | 1 | 1 | 1  | p11c89_aac31939#1    |
| 2 | 1 | 1 | 2  | p11c90_aac39509#1    |
| 2 | 1 | 1 | 3  | p11c91_aac49004#1    |
| 2 | 1 | 1 | 4  | p11c92_aac49523#1    |
| 2 | 1 | 1 | 5  | p11c93_aac78257#1    |
| 2 | 1 | 1 | 6  | p11c94_aad22498#1    |
| 2 | 1 | 1 | 7  | p11c95_aad30242#1    |
| 2 | 1 | 1 | 8  | p11c96_aaf02809#1    |
| 2 | 1 | 1 | 9  | p11c81_aak50102#1    |
| 2 | 1 | 1 | 10 | p11c82_aak64169#1    |
| 2 | 1 | 1 | 11 | p11c83_atr2_ntc#1    |
| 2 | 1 | 1 | 12 | p11c84_baa28625#1    |
| 2 | 1 | 2 | 1  | p11c85_baa96891#1    |
| 2 | 1 | 2 | 2  | p11c86_baa98069#1    |
| 2 | 1 | 2 | 3  | p11c87_bab01716#1    |
| 2 | 1 | 2 | 4  | p11c88_bab03052#1    |
| 2 | 1 | 2 | 5  | p11c73_cab54519#1    |
| 2 | 1 | 2 | 6  | p11c74_cab79562#1    |
| 2 | 1 | 2 | 7  | p11c75_cab80762#1    |
| 2 | 1 | 2 | 8  | p11c76_cab88998#1    |
| 2 | 1 | 2 | 9  | p11c77_cab89000#1    |
| 2 | 1 | 2 | 10 | p11c78_cab96667#1    |
| 2 | 1 | 2 | 11 | p11c79_cmecyp79d2#1  |
| 2 | 1 | 2 | 12 | p11c80_cyp51_ntc#1   |
| 2 | 1 | 3 | 1  | p11c65_cyp705a19_ntc |
| 2 | 1 | 3 | 2  | p11c66_cyp705a20_ntc |
| 2 | 1 | 3 | 3  | p11c67_cyp705a22_ntc |
| 2 | 1 | 3 | 4  | p11c68_cyp705a24_ntc |
| 2 | 1 | 3 | 5  | p11c69_cyp705a27_ntc |
| 2 | 1 | 3 | 6  | p11c70_cyp705a2_ntc# |
| 2 | 1 | 3 | 7  | p11c71_cyp705a32_ntc |
| 2 | 1 | 3 | 8  | p11c72_cyp705a3_ntc# |
| 2 | 1 | 3 | 9  | p11c57_cyp708a2_ntc# |
| 2 | 1 | 3 | 10 | p11c58_cyp708a4_ntc# |
| 2 | 1 | 3 | 11 | p11c59_cyp709a2_ntc# |
| 2 | 1 | 3 | 12 | p11c60_cyp709b2_ntc# |
| 2 | 1 | 4 | 1  | p11c61_cyp710a1_ntc# |
| 2 | 1 | 4 | 2  | p11c62_cyp710a3_ntc# |
| 2 | 1 | 4 | 3  | p11c63_cyp711a1_ntc# |
| 2 | 1 | 4 | 4  | p11c64_cyp712a2_ntc# |
| 2 | 1 | 4 | 5  | p11c49_cyp71a24_ntc# |
| 2 | 1 | 4 | 6  | p11c50_cyp71a26_ntc# |
| 2 | 1 | 4 | 7  | p11c51_cyp71a28_ntc# |
| 2 | 1 | 4 | 8  | p11c52_cyp71b11_ntc# |
| 2 | 1 | 4 | 9  | p11c53_cyp71b13_ntc# |
| 2 | 1 | 4 | 10 | p11c54_cyp71b15_ntc# |
| 2 | 1 | 4 | 11 | p11c55_cyp71b17_ntc# |
| 2 | 1 | 4 | 12 | p11c56_cyp71b19_ntc# |

|   |   |   |    |                      |
|---|---|---|----|----------------------|
| 2 | 1 | 5 | 1  | p11c41_cyp71b36_ntc# |
| 2 | 1 | 5 | 2  | p11c42_cyp71b38_ntc# |
| 2 | 1 | 5 | 3  | p11c43_cyp71b4_ntc#1 |
| 2 | 1 | 5 | 4  | p11c44_cyp71b6_ntc#1 |
| 2 | 1 | 5 | 5  | p11c45_cyp71b8_ntc#1 |
| 2 | 1 | 5 | 6  | p11c46_cyp720a1_ntc# |
| 2 | 1 | 5 | 7  | p11c47_cyp722a1_ntc# |
| 2 | 1 | 5 | 8  | p11c48_cyp72a10_ntc# |
| 2 | 1 | 5 | 9  | p11c33_cyp76c5_ntc#1 |
| 2 | 1 | 5 | 10 | p11c34_cyp76c7_ntc#1 |
| 2 | 1 | 5 | 11 | p11c35_cyp77a4_ntc#1 |
| 2 | 1 | 5 | 12 | p11c36_cyp77a7_ntc#1 |
| 2 | 1 | 6 | 1  | p11c37_cyp77b1_ntc#1 |
| 2 | 1 | 6 | 2  | p11c38_cyp78a5_ntc#1 |
| 2 | 1 | 6 | 3  | p11c39_cyp78a7_ntc#1 |
| 2 | 1 | 6 | 4  | p11c40_cyp78a9_ntc#1 |
| 2 | 1 | 6 | 5  | p11c25_cyp81f2_ntc#1 |
| 2 | 1 | 6 | 6  | p11c26_cyp81f4_ntc#1 |
| 2 | 1 | 6 | 7  | p11c27_cyp81h1_ntc#1 |
| 2 | 1 | 6 | 8  | p11c28_cyp81k2_ntc#1 |
| 2 | 1 | 6 | 9  | p11c29_cyp82c3_ntc#1 |
| 2 | 1 | 6 | 10 | p11c30_cyp82f1_ntc#1 |
| 2 | 1 | 6 | 11 | p11c31_cyp83a1_ntc#1 |
| 2 | 1 | 6 | 12 | p11c32_cyp84a1_ntc#1 |
| 2 | 1 | 7 | 1  | p11c17_cyp89a3_ntc#1 |
| 2 | 1 | 7 | 2  | p11c18_cyp89a5_ntc#1 |
| 2 | 1 | 7 | 3  | p11c19_cyp89a7_ntc#1 |
| 2 | 1 | 7 | 4  | p11c20_cyp90a1_ntc#1 |
| 2 | 1 | 7 | 5  | p11c21_cyp90c1_ntc#1 |
| 2 | 1 | 7 | 6  | p11c22_cyp93d1_ntc#1 |
| 2 | 1 | 7 | 7  | p11c23_cyp94b2_ntc#1 |
| 2 | 1 | 7 | 8  | p11c24_cyp94c1_ntc#1 |
| 2 | 1 | 7 | 9  | p11c9_cyp97c1_ntc#1  |
| 2 | 1 | 7 | 10 | p11c10_cyp98a8_ntc#1 |
| 2 | 1 | 7 | 11 | p11c11_cytb5_1_ntc#1 |
| 2 | 1 | 7 | 12 | p11c12_cytb5_3_ntc#1 |
| 2 | 1 | 8 | 1  | p11c13_cytb5_6_ntc#1 |
| 2 | 1 | 8 | 2  | p11c14_sbcyp79a1#1   |
| 2 | 1 | 8 | 3  | p11c15_ugt71b2_ntc#1 |
| 2 | 1 | 8 | 4  | p11c16_ugt71b6_ntc#1 |
| 2 | 1 | 8 | 5  | p11c1_ugt72e3_ntc#1  |
| 2 | 1 | 8 | 6  | p11c2_ugt73b2_ntc#1  |
| 2 | 1 | 8 | 7  | p11c3_ugt73b4_ntc#1  |
| 2 | 1 | 8 | 8  | p11c4_ugt73c1_ntc#1  |
| 2 | 1 | 8 | 9  | p11c5_ugt73c3_ntc#1  |
| 2 | 1 | 8 | 10 | p11c6_ugt73c5_ntc#1  |
| 2 | 1 | 8 | 11 | p11c7_ugt73c7_ntc#1  |
| 2 | 1 | 8 | 12 | p11c8_ugt74b1_ntc#1  |

|   |   |    |    |                      |
|---|---|----|----|----------------------|
| 2 | 1 | 9  | 1  | p21c89_ugt76e11_ntc# |
| 2 | 1 | 9  | 2  | p21c90_ugt76e1_ntc#1 |
| 2 | 1 | 9  | 3  | p21c91_ugt76e3_ntc#1 |
| 2 | 1 | 9  | 4  | p21c92_ugt76e5_ntc#1 |
| 2 | 1 | 9  | 5  | p21c93_ugt76e7_ntc#1 |
| 2 | 1 | 9  | 6  | p21c94_gapdh         |
| 2 | 1 | 9  | 7  | p21c95_ugt76f1_ntc#1 |
| 2 | 1 | 9  | 8  | p21c96_ugt78d1_ntc#1 |
| 2 | 1 | 9  | 9  | p21c81_ugt84a4_ntc#1 |
| 2 | 1 | 9  | 10 | p21c82_ugt84b2_ntc#1 |
| 2 | 1 | 9  | 11 | p21c83_ugt85a2_ntc#1 |
| 2 | 1 | 9  | 12 | p21c84_ugt85a4_ntc#1 |
| 2 | 1 | 10 | 1  | p21c85_ugt85a7_ntc#1 |
| 2 | 1 | 10 | 2  | p21c86_ugt86a2_ntc#1 |
| 2 | 1 | 10 | 3  | p21c87_ugt87a2_ntc#1 |
| 2 | 1 | 10 | 4  | p21c88_ugt89a2_ntc#1 |
| 2 | 1 | 10 | 5  | p21c73_ugt91a1_ntc#1 |
| 2 | 1 | 10 | 6  | p21c74_ugt91c1_ntc#1 |
| 2 | 1 | 10 | 7  | p21c75_Blank13       |
| 2 | 1 | 10 | 8  | p21c76_Blank15       |
| 2 | 1 | 10 | 9  | p21c77_Blank17       |
| 2 | 1 | 10 | 10 | p21c78_Blank19       |
| 2 | 1 | 10 | 11 | p21c79_Blank21       |
| 2 | 1 | 10 | 12 | p21c80_Blank23       |
| 2 | 2 | 1  | 1  | p13c89_aac35228#1    |
| 2 | 2 | 1  | 2  | p13c90_aac49003#1    |
| 2 | 2 | 1  | 3  | p13c91_aac49117#1    |
| 2 | 2 | 1  | 4  | p13c92_aac73018#1    |
| 2 | 2 | 1  | 5  | p13c93_aad18156#1    |
| 2 | 2 | 1  | 6  | p13c94_aad23027#1    |
| 2 | 2 | 1  | 7  | p13c95_aad47195#1    |
| 2 | 2 | 1  | 8  | p13c96_aaf13081#1    |
| 2 | 2 | 1  | 9  | p13c81_aak64123#1    |
| 2 | 2 | 1  | 10 | p13c82_atr1_ntc#1    |
| 2 | 2 | 1  | 11 | p13c83_atr3_ntc#1    |
| 2 | 2 | 1  | 12 | p13c84_baa90299#1    |
| 2 | 2 | 2  | 1  | p13c85_baa97002#1    |
| 2 | 2 | 2  | 2  | p13c86_bab01715#1    |
| 2 | 2 | 2  | 3  | p13c87_bab02285#1    |
| 2 | 2 | 2  | 4  | p13c88_bab03065#1    |
| 2 | 2 | 2  | 5  | p13c73_cab62622#1    |
| 2 | 2 | 2  | 6  | p13c74_cab79644#1    |
| 2 | 2 | 2  | 7  | p13c75_cab87841#1    |
| 2 | 2 | 2  | 8  | p13c76_cab88999#1    |
| 2 | 2 | 2  | 9  | p13c77_cab94971#1    |
| 2 | 2 | 2  | 10 | p13c78_cmcp79d1#1    |
| 2 | 2 | 2  | 11 | p13c79_cyb_reduc_ntc |
| 2 | 2 | 2  | 12 | p13c80_cyp51a2_ntc#1 |



|   |   |   |    |                      |
|---|---|---|----|----------------------|
| 2 | 2 | 3 | 1  | p13c65_cyp705a1_ntc# |
| 2 | 2 | 3 | 2  | p13c66_cyp705a21_ntc |
| 2 | 2 | 3 | 3  | p13c67_cyp705a23_ntc |
| 2 | 2 | 3 | 4  | p13c68_cyp705a25_ntc |
| 2 | 2 | 3 | 5  | p13c69_cyp705a28_ntc |
| 2 | 2 | 3 | 6  | p13c70_cyp705a30_ntc |
| 2 | 2 | 3 | 7  | p13c71_cyp705a33_ntc |
| 2 | 2 | 3 | 8  | p13c72_cyp705a4_ntc# |
| 2 | 2 | 3 | 9  | p13c57_cyp708a3_ntc# |
| 2 | 2 | 3 | 10 | p13c58_cyp709a1_ntc# |
| 2 | 2 | 3 | 11 | p13c59_cyp709b1_ntc# |
| 2 | 2 | 3 | 12 | p13c60_cyp709b3_ntc# |
| 2 | 2 | 4 | 1  | p13c61_cyp710a2_ntc# |
| 2 | 2 | 4 | 2  | p13c62_cyp710a4_ntc# |
| 2 | 2 | 4 | 3  | p13c63_cyp712a1_ntc# |
| 2 | 2 | 4 | 4  | p13c64_cyp714a1_ntc# |
| 2 | 2 | 4 | 5  | p13c49_cyp71a25_ntc# |
| 2 | 2 | 4 | 6  | p13c50_cyp71a27_ntc# |
| 2 | 2 | 4 | 7  | p13c51_cyp71b10_ntc# |
| 2 | 2 | 4 | 8  | p13c52_cyp71b12_ntc# |
| 2 | 2 | 4 | 9  | p13c53_cyp71b14_ntc# |
| 2 | 2 | 4 | 10 | p13c54_cyp71b16_ntc# |
| 2 | 2 | 4 | 11 | p13c55_cyp71b18_ntc# |
| 2 | 2 | 4 | 12 | p13c56_cyp71b20_ntc# |
| 2 | 2 | 5 | 1  | p13c41_cyp71b37_ntc# |
| 2 | 2 | 5 | 2  | p13c42_cyp71b3_ntc#1 |
| 2 | 2 | 5 | 3  | p13c43_cyp71b5_ntc#1 |
| 2 | 2 | 5 | 4  | p13c44_cyp71b7_ntc#1 |
| 2 | 2 | 5 | 5  | p13c45_cyp71b9_ntc#1 |
| 2 | 2 | 5 | 6  | p13c46_cyp721a1_ntc# |
| 2 | 2 | 5 | 7  | p13c47_cyp724a1_ntc# |
| 2 | 2 | 5 | 8  | p13c48_cyp72a11_ntc# |
| 2 | 2 | 5 | 9  | p13c33_cyp76c6_ntc#1 |
| 2 | 2 | 5 | 10 | p13c34_cyp76g1_ntc#1 |
| 2 | 2 | 5 | 11 | p13c35_cyp77a6_ntc#1 |
| 2 | 2 | 5 | 12 | p13c36_cyp77a9_ntc#1 |
| 2 | 2 | 6 | 1  | p13c37_cyp78a10_ntc# |
| 2 | 2 | 6 | 2  | p13c38_cyp78a6_ntc#1 |
| 2 | 2 | 6 | 3  | p13c39_cyp78a8_ntc#1 |
| 2 | 2 | 6 | 4  | p13c40_cyp79a2_ntc#1 |
| 2 | 2 | 6 | 5  | p13c25_cyp81f3_ntc#1 |
| 2 | 2 | 6 | 6  | p13c26_cyp81g1_ntc#1 |
| 2 | 2 | 6 | 7  | p13c27_cyp81k1_ntc#1 |
| 2 | 2 | 6 | 8  | p13c28_cyp82c2_ntc#1 |
| 2 | 2 | 6 | 9  | p13c29_cyp82c4_ntc#1 |
| 2 | 2 | 6 | 10 | p13c30_cyp82g1_ntc#1 |
| 2 | 2 | 6 | 11 | p13c31_cyp83b1_ntc#1 |
| 2 | 2 | 6 | 12 | p13c32_cyp85_ntc#1   |

|   |   |    |    |                      |
|---|---|----|----|----------------------|
| 2 | 2 | 7  | 1  | p13c17_cyp89a4_ntc#1 |
| 2 | 2 | 7  | 2  | p13c18_cyp89a6_ntc#1 |
| 2 | 2 | 7  | 3  | p13c19_cyp89a9_ntc#1 |
| 2 | 2 | 7  | 4  | p13c20_cyp90b1_ntc#1 |
| 2 | 2 | 7  | 5  | p13c21_cyp90d1_ntc#1 |
| 2 | 2 | 7  | 6  | p13c22_cyp94b1_ntc#1 |
| 2 | 2 | 7  | 7  | p13c23_cyp94b3_ntc#1 |
| 2 | 2 | 7  | 8  | p13c24_cyp94d1_ntc#1 |
| 2 | 2 | 7  | 9  | p13c9_cyp98a3_ntc#1  |
| 2 | 2 | 7  | 10 | p13c10_cyp98a9_ntc#1 |
| 2 | 2 | 7  | 11 | p13c11_cytb5_2_ntc#1 |
| 2 | 2 | 7  | 12 | p13c12_cytb5_4_ntc#1 |
| 2 | 2 | 8  | 1  | p13c13_sbcyp71e1#1   |
| 2 | 2 | 8  | 2  | p13c14_ugt71b1_ntc#1 |
| 2 | 2 | 8  | 3  | p13c15_ugt71b5_ntc#1 |
| 2 | 2 | 8  | 4  | p13c16_ugt71b7_ntc#1 |
| 2 | 2 | 8  | 5  | p13c1_ugt73b1_ntc#1  |
| 2 | 2 | 8  | 6  | p13c2_ugt73b3_ntc#1  |
| 2 | 2 | 8  | 7  | p13c3_ugt73b5_ntc#1  |
| 2 | 2 | 8  | 8  | p13c4_ugt73c2_ntc#1  |
| 2 | 2 | 8  | 9  | p13c5_ugt73c4_ntc#1  |
| 2 | 2 | 8  | 10 | p13c6_ugt73c6_ntc#1  |
| 2 | 2 | 8  | 11 | p13c7_ugt73d1_ntc#1  |
| 2 | 2 | 8  | 12 | p13c8_ugt74c1_ntc#1  |
| 2 | 2 | 9  | 1  | p23c89_ugt76e12_ntc# |
| 2 | 2 | 9  | 2  | p23c90_ugt76e2_ntc#1 |
| 2 | 2 | 9  | 3  | p23c91_ugt76e4_ntc#1 |
| 2 | 2 | 9  | 4  | p23c92_ugt76e6_ntc#1 |
| 2 | 2 | 9  | 5  | p23c93_ugt76e9_ntc#1 |
| 2 | 2 | 9  | 6  | p23c94_gapdh         |
| 2 | 2 | 9  | 7  | p23c95_ugt76f2_ntc#1 |
| 2 | 2 | 9  | 8  | p23c96_ugt78d2_ntc#1 |
| 2 | 2 | 9  | 9  | p23c81_ugt84b1_ntc#1 |
| 2 | 2 | 9  | 10 | p23c82_ugt85a1_ntc#1 |
| 2 | 2 | 9  | 11 | p23c83_ugt85a3_ntc#1 |
| 2 | 2 | 9  | 12 | p23c84_ugt85a5_ntc#1 |
| 2 | 2 | 10 | 1  | p23c85_ugt86a1_ntc#1 |
| 2 | 2 | 10 | 2  | p23c86_ugt87a1_ntc#1 |
| 2 | 2 | 10 | 3  | p23c87_ugt88a1_ntc#1 |
| 2 | 2 | 10 | 4  | p23c88_ugt89b1_ntc#1 |
| 2 | 2 | 10 | 5  | p23c73_ugt91b1_ntc#1 |
| 2 | 2 | 10 | 6  | p23c74_ugt92a1_ntc#1 |
| 2 | 2 | 10 | 7  | p23c75_Blank14       |
| 2 | 2 | 10 | 8  | p23c76_Blank16       |
| 2 | 2 | 10 | 9  | p23c77_Blank18       |
| 2 | 2 | 10 | 10 | p23c78_Blank20       |
| 2 | 2 | 10 | 11 | p23c79_Blank22       |
| 2 | 2 | 10 | 12 | p23c80_Blank24       |

|   |   |   |    |                      |
|---|---|---|----|----------------------|
| 3 | 1 | 1 | 1  | p12c89_sbhmngt#1     |
| 3 | 1 | 1 | 2  | p12c90_aaa32785#1    |
| 3 | 1 | 1 | 3  | p12c91_aaa82888#1    |
| 3 | 1 | 1 | 4  | p12c92_aab37098#1    |
| 3 | 1 | 1 | 5  | p12c93_aab70035#1    |
| 3 | 1 | 1 | 6  | p12c94_aab95308#1    |
| 3 | 1 | 1 | 7  | p12c95_aac04865#1    |
| 3 | 1 | 1 | 8  | p12c96_aac04900#1    |
| 3 | 1 | 1 | 9  | p12c81_aaf18250#1    |
| 3 | 1 | 1 | 10 | p12c82_aaf23561#1    |
| 3 | 1 | 1 | 11 | p12c83_aaf32299#1    |
| 3 | 1 | 1 | 12 | p12c84_aag28813#1    |
| 3 | 1 | 2 | 1  | p12c85_aag38877#1    |
| 3 | 1 | 2 | 2  | p12c86_aag50662#1    |
| 3 | 1 | 2 | 3  | p12c87_aag51148#1    |
| 3 | 1 | 2 | 4  | p12c88_aak43477#1    |
| 3 | 1 | 2 | 5  | p12c73_bab08760#1    |
| 3 | 1 | 2 | 6  | p12c74_bab08859#1    |
| 3 | 1 | 2 | 7  | p12c75_bab10427#1    |
| 3 | 1 | 2 | 8  | p12c76_bab11669#1    |
| 3 | 1 | 2 | 9  | p12c77_caa23025#1    |
| 3 | 1 | 2 | 10 | p12c78_caa23064#1    |
| 3 | 1 | 2 | 11 | p12c79_caa73905#1    |
| 3 | 1 | 2 | 12 | p12c80_cab43691#1    |
| 3 | 1 | 3 | 1  | p12c65_cyp701a3_ntc# |
| 3 | 1 | 3 | 2  | p12c66_cyp702a2_ntc# |
| 3 | 1 | 3 | 3  | p12c67_cyp702a5_ntc# |
| 3 | 1 | 3 | 4  | p12c68_cyp702a8_ntc# |
| 3 | 1 | 3 | 5  | p12c69_cyp704a1_ntc# |
| 3 | 1 | 3 | 6  | p12c70_cyp704b1_ntc# |
| 3 | 1 | 3 | 7  | p12c71_cyp705a13_ntc |
| 3 | 1 | 3 | 8  | p12c72_cyp705a16_ntc |
| 3 | 1 | 3 | 9  | p12c57_cyp705a5_ntc# |
| 3 | 1 | 3 | 10 | p12c58_cyp705a8_ntc# |
| 3 | 1 | 3 | 11 | p12c59_cyp706a1_ntc# |
| 3 | 1 | 3 | 12 | p12c60_cyp706a3_ntc# |
| 3 | 1 | 4 | 1  | p12c61_cyp706a5_ntc# |
| 3 | 1 | 4 | 2  | p12c62_cyp706a7_ntc# |
| 3 | 1 | 4 | 3  | p12c63_cyp707a2_ntc# |
| 3 | 1 | 4 | 4  | p12c64_cyp707a4_ntc# |
| 3 | 1 | 4 | 5  | p12c49_cyp714a2_ntc# |
| 3 | 1 | 4 | 6  | p12c50_cyp716a1_ntc# |
| 3 | 1 | 4 | 7  | p12c51_cyp718_ntc#1  |
| 3 | 1 | 4 | 8  | p12c52_cyp71a13_ntc# |
| 3 | 1 | 4 | 9  | p12c53_cyp71a15_ntc# |
| 3 | 1 | 4 | 10 | p12c54_cyp71a18_ntc# |
| 3 | 1 | 4 | 11 | p12c55_cyp71a20_ntc# |
| 3 | 1 | 4 | 12 | p12c56_cyp71a22_ntc# |

|   |   |   |    |                      |
|---|---|---|----|----------------------|
| 3 | 1 | 5 | 1  | p12c41_cyp71b21_ntc# |
| 3 | 1 | 5 | 2  | p12c42_cyp71b23_ntc# |
| 3 | 1 | 5 | 3  | p12c43_cyp71b25_ntc# |
| 3 | 1 | 5 | 4  | p12c44_cyp71b28_ntc# |
| 3 | 1 | 5 | 5  | p12c45_cyp71b2_ntc#1 |
| 3 | 1 | 5 | 6  | p12c46_gapdh         |
| 3 | 1 | 5 | 7  | p12c47_cyp71b32_ntc# |
| 3 | 1 | 5 | 8  | p12c48_cyp71b34_ntc# |
| 3 | 1 | 5 | 9  | p12c33_cyp72a13_ntc# |
| 3 | 1 | 5 | 10 | p12c34_cyp72a15_ntc# |
| 3 | 1 | 5 | 11 | p12c35_cyp72a8_ntc#1 |
| 3 | 1 | 5 | 12 | p12c36_cyp72b1_ntc#1 |
| 3 | 1 | 6 | 1  | p12c37_cyp73a5_ntc#1 |
| 3 | 1 | 6 | 2  | p12c38_cyp74b2_ntc#1 |
| 3 | 1 | 6 | 3  | p12c39_cyp76c1_ntc#1 |
| 3 | 1 | 6 | 4  | p12c40_cyp76c3_ntc#1 |
| 3 | 1 | 6 | 5  | p12c25_cyp79b2_ntc#1 |
| 3 | 1 | 6 | 6  | p12c26_cyp79c1_ntc#1 |
| 3 | 1 | 6 | 7  | p12c27_cyp79f1_ntc#1 |
| 3 | 1 | 6 | 8  | p12c28_cyp81d11_ntc# |
| 3 | 1 | 6 | 9  | p12c29_cyp81d2_ntc#1 |
| 3 | 1 | 6 | 10 | p12c30_cyp81d4_ntc#1 |
| 3 | 1 | 6 | 11 | p12c31_cyp81d6_ntc#1 |
| 3 | 1 | 6 | 12 | p12c32_cyp81d8_ntc#1 |
| 3 | 1 | 7 | 1  | p12c17_cyp85a2_ntc#1 |
| 3 | 1 | 7 | 2  | p12c18_cyp86a2_ntc#1 |
| 3 | 1 | 7 | 3  | p12c19_cyp86a7_ntc#1 |
| 3 | 1 | 7 | 4  | p12c20_cyp86b1_ntc#1 |
| 3 | 1 | 7 | 5  | p12c21_cyp86c1_ntc#1 |
| 3 | 1 | 7 | 6  | p12c22_cyp86c3_ntc#1 |
| 3 | 1 | 7 | 7  | p12c23_cyp87a2_ntc#1 |
| 3 | 1 | 7 | 8  | p12c24_cyp88a4_ntc#1 |
| 3 | 1 | 7 | 9  | p12c9_cyp94d2_ntc#1  |
| 3 | 1 | 7 | 10 | p12c10_cyp96a11_ntc# |
| 3 | 1 | 7 | 11 | p12c11_cyp96a13_ntc# |
| 3 | 1 | 7 | 12 | p12c12_cyp96a1_ntc#1 |
| 3 | 1 | 8 | 1  | p12c13_cyp96a3_ntc#1 |
| 3 | 1 | 8 | 2  | p12c14_cyp96a5_ntc#1 |
| 3 | 1 | 8 | 3  | p12c15_cyp96a8_ntc#1 |
| 3 | 1 | 8 | 4  | p12c16_cyp97a3_ntc#1 |
| 3 | 1 | 8 | 5  | p12c1_ugt71b8_ntc#1  |
| 3 | 1 | 8 | 6  | p12c2_ugt71c2_ntc#1  |
| 3 | 1 | 8 | 7  | p12c3_ugt71c4_ntc#1  |
| 3 | 1 | 8 | 8  | p12c4_ugt71d1_ntc#1  |
| 3 | 1 | 8 | 9  | p12c5_ugt72b1_ntc#1  |
| 3 | 1 | 8 | 10 | p12c6_ugt72b3_ntc#1  |
| 3 | 1 | 8 | 11 | p12c7_ugt72d1_ntc#1  |
| 3 | 1 | 8 | 12 | p12c8_ugt72e1_ntc#1  |

|   |   |    |    |                      |
|---|---|----|----|----------------------|
| 3 | 1 | 9  | 1  | p22c89_ugt74d1_ntc#1 |
| 3 | 1 | 9  | 2  | p22c90_ugt74e2_ntc#1 |
| 3 | 1 | 9  | 3  | p22c91_ugt74f2_ntc#1 |
| 3 | 1 | 9  | 4  | p22c92_ugt75b2_ntc#1 |
| 3 | 1 | 9  | 5  | p22c93_ugt75d1_ntc#1 |
| 3 | 1 | 9  | 6  | p22c94_ugt76c1_ntc#1 |
| 3 | 1 | 9  | 7  | p22c95_ugt76c3_ntc#1 |
| 3 | 1 | 9  | 8  | p22c96_ugt76c5_ntc#1 |
| 3 | 1 | 9  | 9  | p22c81_ugt78d3_ntc#1 |
| 3 | 1 | 9  | 10 | p22c82_ugt79b11_ntc# |
| 3 | 1 | 9  | 11 | p22c83_ugt79b2_ntc#1 |
| 3 | 1 | 9  | 12 | p22c84_ugt79b5_ntc#1 |
| 3 | 1 | 10 | 1  | p22c85_ugt79b7_ntc#1 |
| 3 | 1 | 10 | 2  | p22c86_ugt79b9_ntc#1 |
| 3 | 1 | 10 | 3  | p22c87_ugt83a1_ntc#1 |
| 3 | 1 | 10 | 4  | p22c88_ugt84a2_ntc#1 |
| 3 | 1 | 10 | 5  | p22c73_ugt89c1_ntc#1 |
| 3 | 1 | 10 | 6  | p22c74_ugt90a2_ntc#1 |
| 3 | 1 | 10 | 7  | p22c75_Blank1        |
| 3 | 1 | 10 | 8  | p22c76_Blank3        |
| 3 | 1 | 10 | 9  | p22c77_Blank5        |
| 3 | 1 | 10 | 10 | p22c78_Blank7        |
| 3 | 1 | 10 | 11 | p22c79_Blank9        |
| 3 | 1 | 10 | 12 | p22c80_Blank11       |
| 3 | 2 | 1  | 1  | p14c89_aaa32784#1    |
| 3 | 2 | 1  | 2  | p14c90_aaa60380#1    |
| 3 | 2 | 1  | 3  | p14c91_aab02913#1    |
| 3 | 2 | 1  | 4  | p14c92_aab60293#1    |
| 3 | 2 | 1  | 5  | p14c93_aab80641#1    |
| 3 | 2 | 1  | 6  | p14c94_aab95309#1    |
| 3 | 2 | 1  | 7  | p14c95_aac04866#1    |
| 3 | 2 | 1  | 8  | p14c96_aac16744#1    |
| 3 | 2 | 1  | 9  | p14c81_aaf22898#1    |
| 3 | 2 | 1  | 10 | p14c82_aaf26137#1    |
| 3 | 2 | 1  | 11 | p14c83_aaf87896#1    |
| 3 | 2 | 1  | 12 | p14c84_aag37061#1    |
| 3 | 2 | 2  | 1  | p14c85_aag40089#1    |
| 3 | 2 | 2  | 2  | p14c86_aag50869#1    |
| 3 | 2 | 2  | 3  | p14c87_aag51444#1    |
| 3 | 2 | 2  | 4  | p14c88_aak49620#1    |
| 3 | 2 | 2  | 5  | p14c73_bab08811#1    |
| 3 | 2 | 2  | 6  | p14c74_bab09667#1    |
| 3 | 2 | 2  | 7  | p14c75_bab10727#1    |
| 3 | 2 | 2  | 8  | p14c76_caa22980#1    |
| 3 | 2 | 2  | 9  | p14c77_caa23026#1    |
| 3 | 2 | 2  | 10 | p14c78_caa29828#1    |
| 3 | 2 | 2  | 11 | p14c79_cab41936#1    |
| 3 | 2 | 2  | 12 | p14c80_cab54518#1    |

|   |   |   |    |                      |
|---|---|---|----|----------------------|
| 3 | 2 | 3 | 1  | p14c65_cyp702a1_ntc# |
| 3 | 2 | 3 | 2  | p14c66_cyp702a3_ntc# |
| 3 | 2 | 3 | 3  | p14c67_cyp702a6_ntc# |
| 3 | 2 | 3 | 4  | p14c68_cyp703a2_ntc# |
| 3 | 2 | 3 | 5  | p14c69_cyp704a2_ntc# |
| 3 | 2 | 3 | 6  | p14c70_cyp705a12_ntc |
| 3 | 2 | 3 | 7  | p14c71_cyp705a15_ntc |
| 3 | 2 | 3 | 8  | p14c72_cyp705a18_ntc |
| 3 | 2 | 3 | 9  | p14c57_cyp705a6_ntc# |
| 3 | 2 | 3 | 10 | p14c58_cyp705a9_ntc# |
| 3 | 2 | 3 | 11 | p14c59_cyp706a2_ntc# |
| 3 | 2 | 3 | 12 | p14c60_cyp706a4_ntc# |
| 3 | 2 | 4 | 1  | p14c61_cyp706a6_ntc# |
| 3 | 2 | 4 | 2  | p14c62_cyp707a1_ntc# |
| 3 | 2 | 4 | 3  | p14c63_cyp707a3_ntc# |
| 3 | 2 | 4 | 4  | p14c64_cyp708a1_ntc# |
| 3 | 2 | 4 | 5  | p14c49_cyp715a1_ntc# |
| 3 | 2 | 4 | 6  | p14c50_cyp716a2_ntc# |
| 3 | 2 | 4 | 7  | p14c51_cyp71a12_ntc# |
| 3 | 2 | 4 | 8  | p14c52_cyp71a14_ntc# |
| 3 | 2 | 4 | 9  | p14c53_cyp71a16_ntc# |
| 3 | 2 | 4 | 10 | p14c54_cyp71a19_ntc# |
| 3 | 2 | 4 | 11 | p14c55_cyp71a21_ntc# |
| 3 | 2 | 4 | 12 | p14c56_cyp71a23_ntc# |
| 3 | 2 | 5 | 1  | p14c41_cyp71b22_ntc# |
| 3 | 2 | 5 | 2  | p14c42_cyp71b24_ntc# |
| 3 | 2 | 5 | 3  | p14c43_cyp71b26_ntc# |
| 3 | 2 | 5 | 4  | p14c44_cyp71b29_ntc# |
| 3 | 2 | 5 | 5  | p14c45_cyp71b31_ntc# |
| 3 | 2 | 5 | 6  | p14c46_gapdh         |
| 3 | 2 | 5 | 7  | p14c47_cyp71b33_ntc# |
| 3 | 2 | 5 | 8  | p14c48_cyp71b35_ntc# |
| 3 | 2 | 5 | 9  | p14c33_cyp72a14_ntc# |
| 3 | 2 | 5 | 10 | p14c34_cyp72a7_ntc#1 |
| 3 | 2 | 5 | 11 | p14c35_cyp72a9_ntc#1 |
| 3 | 2 | 5 | 12 | p14c36_cyp72c1_ntc#1 |
| 3 | 2 | 6 | 1  | p14c37_cyp74a_ntc#1  |
| 3 | 2 | 6 | 2  | p14c38_cyp75b1_ntc#1 |
| 3 | 2 | 6 | 3  | p14c39_cyp76c2_ntc#1 |
| 3 | 2 | 6 | 4  | p14c40_cyp76c4_ntc#1 |
| 3 | 2 | 6 | 5  | p14c25_cyp79b3_ntc#1 |
| 3 | 2 | 6 | 6  | p14c26_cyp79c2_ntc#1 |
| 3 | 2 | 6 | 7  | p14c27_cyp79f2_ntc#1 |
| 3 | 2 | 6 | 8  | p14c28_cyp81d1_ntc#1 |
| 3 | 2 | 6 | 9  | p14c29_cyp81d3_ntc#1 |
| 3 | 2 | 6 | 10 | p14c30_cyp81d5_ntc#1 |
| 3 | 2 | 6 | 11 | p14c31_cyp81d7_ntc#1 |
| 3 | 2 | 6 | 12 | p14c32_cyp81f1_ntc#1 |

|   |   |    |    |                      |
|---|---|----|----|----------------------|
| 3 | 2 | 7  | 1  | p14c17_cyp86a1_ntc#1 |
| 3 | 2 | 7  | 2  | p14c18_cyp86a4_ntc#1 |
| 3 | 2 | 7  | 3  | p14c19_cyp86a8_ntc#1 |
| 3 | 2 | 7  | 4  | p14c20_cyp86b2_ntc#1 |
| 3 | 2 | 7  | 5  | p14c21_cyp86c2_ntc#1 |
| 3 | 2 | 7  | 6  | p14c22_cyp86c4_ntc#1 |
| 3 | 2 | 7  | 7  | p14c23_cyp88a3_ntc#1 |
| 3 | 2 | 7  | 8  | p14c24_cyp89a2_ntc#1 |
| 3 | 2 | 7  | 9  | p14c9_cyp96a10_ntc#1 |
| 3 | 2 | 7  | 10 | p14c10_cyp96a12_ntc# |
| 3 | 2 | 7  | 11 | p14c11_cyp96a15_ntc# |
| 3 | 2 | 7  | 12 | p14c12_cyp96a2_ntc#1 |
| 3 | 2 | 8  | 1  | p14c13_cyp96a4_ntc#1 |
| 3 | 2 | 8  | 2  | p14c14_cyp96a7_ntc#1 |
| 3 | 2 | 8  | 3  | p14c15_cyp96a9_ntc#1 |
| 3 | 2 | 8  | 4  | p14c16_cyp97b3_ntc#1 |
| 3 | 2 | 8  | 5  | p14c1_ugt71c1_ntc#1  |
| 3 | 2 | 8  | 6  | p14c2_ugt71c3_ntc#1  |
| 3 | 2 | 8  | 7  | p14c3_ugt71c5_ntc#1  |
| 3 | 2 | 8  | 8  | p14c4_ugt71d2_ntc#1  |
| 3 | 2 | 8  | 9  | p14c5_ugt72b2_ntc#1  |
| 3 | 2 | 8  | 10 | p14c6_ugt72c1_ntc#1  |
| 3 | 2 | 8  | 11 | p14c7_ugt72d2#1      |
| 3 | 2 | 8  | 12 | p14c8_ugt72e2_ntc#1  |
| 3 | 2 | 9  | 1  | p24c89_ugt74e1_ntc#1 |
| 3 | 2 | 9  | 2  | p24c90_ugt74f1_ntc#1 |
| 3 | 2 | 9  | 3  | p24c91_ugt75b1_ntc#1 |
| 3 | 2 | 9  | 4  | p24c92_ugt75c1_ntc#1 |
| 3 | 2 | 9  | 5  | p24c93_ugt76b1_ntc#1 |
| 3 | 2 | 9  | 6  | p24c94_ugt76c2_ntc#1 |
| 3 | 2 | 9  | 7  | p24c95_ugt76c4_ntc#1 |
| 3 | 2 | 9  | 8  | p24c96_ugt76d1_ntc#1 |
| 3 | 2 | 9  | 9  | p24c81_ugt79b10_ntc# |
| 3 | 2 | 9  | 10 | p24c82_ugt79b1_ntc#1 |
| 3 | 2 | 9  | 11 | p24c83_ugt79b4_ntc#1 |
| 3 | 2 | 9  | 12 | p24c84_ugt79b6_ntc#1 |
| 3 | 2 | 10 | 1  | p24c85_ugt79b8_ntc#1 |
| 3 | 2 | 10 | 2  | p24c86_ugt82a1_ntc#1 |
| 3 | 2 | 10 | 3  | p24c87_ugt84a1_ntc#1 |
| 3 | 2 | 10 | 4  | p24c88_ugt84a3_ntc#1 |
| 3 | 2 | 10 | 5  | p24c73_ugt90a1_ntc#1 |
| 3 | 2 | 10 | 6  | p24c74_ugt90a4_ntc#1 |
| 3 | 2 | 10 | 7  | p24c75_Blank2        |
| 3 | 2 | 10 | 8  | p24c76_Blank4        |
| 3 | 2 | 10 | 9  | p24c77_Blank6        |
| 3 | 2 | 10 | 10 | p24c78_Blank8        |
| 3 | 2 | 10 | 11 | p24c79_Blank10       |
| 3 | 2 | 10 | 12 | p24c80_Blank12       |

|   |   |   |    |                      |
|---|---|---|----|----------------------|
| 4 | 1 | 1 | 1  | p11c89_aac31939#1    |
| 4 | 1 | 1 | 2  | p11c90_aac39509#1    |
| 4 | 1 | 1 | 3  | p11c91_aac49004#1    |
| 4 | 1 | 1 | 4  | p11c92_aac49523#1    |
| 4 | 1 | 1 | 5  | p11c93_aac78257#1    |
| 4 | 1 | 1 | 6  | p11c94_aad22498#1    |
| 4 | 1 | 1 | 7  | p11c95_aad30242#1    |
| 4 | 1 | 1 | 8  | p11c96_aaf02809#1    |
| 4 | 1 | 1 | 9  | p11c81_aak50102#1    |
| 4 | 1 | 1 | 10 | p11c82_aak64169#1    |
| 4 | 1 | 1 | 11 | p11c83_atr2_ntc#1    |
| 4 | 1 | 1 | 12 | p11c84_baa28625#1    |
| 4 | 1 | 2 | 1  | p11c85_baa96891#1    |
| 4 | 1 | 2 | 2  | p11c86_baa98069#1    |
| 4 | 1 | 2 | 3  | p11c87_bab01716#1    |
| 4 | 1 | 2 | 4  | p11c88_bab03052#1    |
| 4 | 1 | 2 | 5  | p11c73_cab54519#1    |
| 4 | 1 | 2 | 6  | p11c74_cab79562#1    |
| 4 | 1 | 2 | 7  | p11c75_cab80762#1    |
| 4 | 1 | 2 | 8  | p11c76_cab88998#1    |
| 4 | 1 | 2 | 9  | p11c77_cab89000#1    |
| 4 | 1 | 2 | 10 | p11c78_cab96667#1    |
| 4 | 1 | 2 | 11 | p11c79_cmecyp79d2#1  |
| 4 | 1 | 2 | 12 | p11c80_cyp51_ntc#1   |
| 4 | 1 | 3 | 1  | p11c65_cyp705a19_ntc |
| 4 | 1 | 3 | 2  | p11c66_cyp705a20_ntc |
| 4 | 1 | 3 | 3  | p11c67_cyp705a22_ntc |
| 4 | 1 | 3 | 4  | p11c68_cyp705a24_ntc |
| 4 | 1 | 3 | 5  | p11c69_cyp705a27_ntc |
| 4 | 1 | 3 | 6  | p11c70_cyp705a2_ntc# |
| 4 | 1 | 3 | 7  | p11c71_cyp705a32_ntc |
| 4 | 1 | 3 | 8  | p11c72_cyp705a3_ntc# |
| 4 | 1 | 3 | 9  | p11c57_cyp708a2_ntc# |
| 4 | 1 | 3 | 10 | p11c58_cyp708a4_ntc# |
| 4 | 1 | 3 | 11 | p11c59_cyp709a2_ntc# |
| 4 | 1 | 3 | 12 | p11c60_cyp709b2_ntc# |
| 4 | 1 | 4 | 1  | p11c61_cyp710a1_ntc# |
| 4 | 1 | 4 | 2  | p11c62_cyp710a3_ntc# |
| 4 | 1 | 4 | 3  | p11c63_cyp711a1_ntc# |
| 4 | 1 | 4 | 4  | p11c64_cyp712a2_ntc# |
| 4 | 1 | 4 | 5  | p11c49_cyp71a24_ntc# |
| 4 | 1 | 4 | 6  | p11c50_cyp71a26_ntc# |
| 4 | 1 | 4 | 7  | p11c51_cyp71a28_ntc# |
| 4 | 1 | 4 | 8  | p11c52_cyp71b11_ntc# |
| 4 | 1 | 4 | 9  | p11c53_cyp71b13_ntc# |
| 4 | 1 | 4 | 10 | p11c54_cyp71b15_ntc# |
| 4 | 1 | 4 | 11 | p11c55_cyp71b17_ntc# |
| 4 | 1 | 4 | 12 | p11c56_cyp71b19_ntc# |



|   |   |   |    |                      |
|---|---|---|----|----------------------|
| 4 | 1 | 5 | 1  | p11c41_cyp71b36_ntc# |
| 4 | 1 | 5 | 2  | p11c42_cyp71b38_ntc# |
| 4 | 1 | 5 | 3  | p11c43_cyp71b4_ntc#1 |
| 4 | 1 | 5 | 4  | p11c44_cyp71b6_ntc#1 |
| 4 | 1 | 5 | 5  | p11c45_cyp71b8_ntc#1 |
| 4 | 1 | 5 | 6  | p11c46_cyp720a1_ntc# |
| 4 | 1 | 5 | 7  | p11c47_cyp722a1_ntc# |
| 4 | 1 | 5 | 8  | p11c48_cyp72a10_ntc# |
| 4 | 1 | 5 | 9  | p11c33_cyp76c5_ntc#1 |
| 4 | 1 | 5 | 10 | p11c34_cyp76c7_ntc#1 |
| 4 | 1 | 5 | 11 | p11c35_cyp77a4_ntc#1 |
| 4 | 1 | 5 | 12 | p11c36_cyp77a7_ntc#1 |
| 4 | 1 | 6 | 1  | p11c37_cyp77b1_ntc#1 |
| 4 | 1 | 6 | 2  | p11c38_cyp78a5_ntc#1 |
| 4 | 1 | 6 | 3  | p11c39_cyp78a7_ntc#1 |
| 4 | 1 | 6 | 4  | p11c40_cyp78a9_ntc#1 |
| 4 | 1 | 6 | 5  | p11c25_cyp81f2_ntc#1 |
| 4 | 1 | 6 | 6  | p11c26_cyp81f4_ntc#1 |
| 4 | 1 | 6 | 7  | p11c27_cyp81h1_ntc#1 |
| 4 | 1 | 6 | 8  | p11c28_cyp81k2_ntc#1 |
| 4 | 1 | 6 | 9  | p11c29_cyp82c3_ntc#1 |
| 4 | 1 | 6 | 10 | p11c30_cyp82f1_ntc#1 |
| 4 | 1 | 6 | 11 | p11c31_cyp83a1_ntc#1 |
| 4 | 1 | 6 | 12 | p11c32_cyp84a1_ntc#1 |
| 4 | 1 | 7 | 1  | p11c17_cyp89a3_ntc#1 |
| 4 | 1 | 7 | 2  | p11c18_cyp89a5_ntc#1 |
| 4 | 1 | 7 | 3  | p11c19_cyp89a7_ntc#1 |
| 4 | 1 | 7 | 4  | p11c20_cyp90a1_ntc#1 |
| 4 | 1 | 7 | 5  | p11c21_cyp90c1_ntc#1 |
| 4 | 1 | 7 | 6  | p11c22_cyp93d1_ntc#1 |
| 4 | 1 | 7 | 7  | p11c23_cyp94b2_ntc#1 |
| 4 | 1 | 7 | 8  | p11c24_cyp94c1_ntc#1 |
| 4 | 1 | 7 | 9  | p11c9_cyp97c1_ntc#1  |
| 4 | 1 | 7 | 10 | p11c10_cyp98a8_ntc#1 |
| 4 | 1 | 7 | 11 | p11c11_cytb5_1_ntc#1 |
| 4 | 1 | 7 | 12 | p11c12_cytb5_3_ntc#1 |
| 4 | 1 | 8 | 1  | p11c13_cytb5_6_ntc#1 |
| 4 | 1 | 8 | 2  | p11c14_sbcyp79a1#1   |
| 4 | 1 | 8 | 3  | p11c15_ugt71b2_ntc#1 |
| 4 | 1 | 8 | 4  | p11c16_ugt71b6_ntc#1 |
| 4 | 1 | 8 | 5  | p11c1_ugt72e3_ntc#1  |
| 4 | 1 | 8 | 6  | p11c2_ugt73b2_ntc#1  |
| 4 | 1 | 8 | 7  | p11c3_ugt73b4_ntc#1  |
| 4 | 1 | 8 | 8  | p11c4_ugt73c1_ntc#1  |
| 4 | 1 | 8 | 9  | p11c5_ugt73c3_ntc#1  |
| 4 | 1 | 8 | 10 | p11c6_ugt73c5_ntc#1  |
| 4 | 1 | 8 | 11 | p11c7_ugt73c7_ntc#1  |
| 4 | 1 | 8 | 12 | p11c8_ugt74b1_ntc#1  |

|   |   |    |    |                      |
|---|---|----|----|----------------------|
| 4 | 1 | 9  | 1  | p21c89_ugt76e11_ntc# |
| 4 | 1 | 9  | 2  | p21c90_ugt76e1_ntc#1 |
| 4 | 1 | 9  | 3  | p21c91_ugt76e3_ntc#1 |
| 4 | 1 | 9  | 4  | p21c92_ugt76e5_ntc#1 |
| 4 | 1 | 9  | 5  | p21c93_ugt76e7_ntc#1 |
| 4 | 1 | 9  | 6  | p21c94_gapdh         |
| 4 | 1 | 9  | 7  | p21c95_ugt76f1_ntc#1 |
| 4 | 1 | 9  | 8  | p21c96_ugt78d1_ntc#1 |
| 4 | 1 | 9  | 9  | p21c81_ugt84a4_ntc#1 |
| 4 | 1 | 9  | 10 | p21c82_ugt84b2_ntc#1 |
| 4 | 1 | 9  | 11 | p21c83_ugt85a2_ntc#1 |
| 4 | 1 | 9  | 12 | p21c84_ugt85a4_ntc#1 |
| 4 | 1 | 10 | 1  | p21c85_ugt85a7_ntc#1 |
| 4 | 1 | 10 | 2  | p21c86_ugt86a2_ntc#1 |
| 4 | 1 | 10 | 3  | p21c87_ugt87a2_ntc#1 |
| 4 | 1 | 10 | 4  | p21c88_ugt89a2_ntc#1 |
| 4 | 1 | 10 | 5  | p21c73_ugt91a1_ntc#1 |
| 4 | 1 | 10 | 6  | p21c74_ugt91c1_ntc#1 |
| 4 | 1 | 10 | 7  | p21c75_Blank13       |
| 4 | 1 | 10 | 8  | p21c76_Blank15       |
| 4 | 1 | 10 | 9  | p21c77_Blank17       |
| 4 | 1 | 10 | 10 | p21c78_Blank19       |
| 4 | 1 | 10 | 11 | p21c79_Blank21       |
| 4 | 1 | 10 | 12 | p21c80_Blank23       |
| 4 | 2 | 1  | 1  | p13c89_aac35228#1    |
| 4 | 2 | 1  | 2  | p13c90_aac49003#1    |
| 4 | 2 | 1  | 3  | p13c91_aac49117#1    |
| 4 | 2 | 1  | 4  | p13c92_aac73018#1    |
| 4 | 2 | 1  | 5  | p13c93_aad18156#1    |
| 4 | 2 | 1  | 6  | p13c94_aad23027#1    |
| 4 | 2 | 1  | 7  | p13c95_aad47195#1    |
| 4 | 2 | 1  | 8  | p13c96_aaf13081#1    |
| 4 | 2 | 1  | 9  | p13c81_aak64123#1    |
| 4 | 2 | 1  | 10 | p13c82_atr1_ntc#1    |
| 4 | 2 | 1  | 11 | p13c83_atr3_ntc#1    |
| 4 | 2 | 1  | 12 | p13c84_baa90299#1    |
| 4 | 2 | 2  | 1  | p13c85_baa97002#1    |
| 4 | 2 | 2  | 2  | p13c86_bab01715#1    |
| 4 | 2 | 2  | 3  | p13c87_bab02285#1    |
| 4 | 2 | 2  | 4  | p13c88_bab03065#1    |
| 4 | 2 | 2  | 5  | p13c73_cab62622#1    |
| 4 | 2 | 2  | 6  | p13c74_cab79644#1    |
| 4 | 2 | 2  | 7  | p13c75_cab87841#1    |
| 4 | 2 | 2  | 8  | p13c76_cab88999#1    |
| 4 | 2 | 2  | 9  | p13c77_cab94971#1    |
| 4 | 2 | 2  | 10 | p13c78_cmcp79d1#1    |
| 4 | 2 | 2  | 11 | p13c79_cyb_reduc_ntc |
| 4 | 2 | 2  | 12 | p13c80_cyp51a2_ntc#1 |

|   |   |   |    |                      |
|---|---|---|----|----------------------|
| 4 | 2 | 3 | 1  | p13c65_cyp705a1_ntc# |
| 4 | 2 | 3 | 2  | p13c66_cyp705a21_ntc |
| 4 | 2 | 3 | 3  | p13c67_cyp705a23_ntc |
| 4 | 2 | 3 | 4  | p13c68_cyp705a25_ntc |
| 4 | 2 | 3 | 5  | p13c69_cyp705a28_ntc |
| 4 | 2 | 3 | 6  | p13c70_cyp705a30_ntc |
| 4 | 2 | 3 | 7  | p13c71_cyp705a33_ntc |
| 4 | 2 | 3 | 8  | p13c72_cyp705a4_ntc# |
| 4 | 2 | 3 | 9  | p13c57_cyp708a3_ntc# |
| 4 | 2 | 3 | 10 | p13c58_cyp709a1_ntc# |
| 4 | 2 | 3 | 11 | p13c59_cyp709b1_ntc# |
| 4 | 2 | 3 | 12 | p13c60_cyp709b3_ntc# |
| 4 | 2 | 4 | 1  | p13c61_cyp710a2_ntc# |
| 4 | 2 | 4 | 2  | p13c62_cyp710a4_ntc# |
| 4 | 2 | 4 | 3  | p13c63_cyp712a1_ntc# |
| 4 | 2 | 4 | 4  | p13c64_cyp714a1_ntc# |
| 4 | 2 | 4 | 5  | p13c49_cyp71a25_ntc# |
| 4 | 2 | 4 | 6  | p13c50_cyp71a27_ntc# |
| 4 | 2 | 4 | 7  | p13c51_cyp71b10_ntc# |
| 4 | 2 | 4 | 8  | p13c52_cyp71b12_ntc# |
| 4 | 2 | 4 | 9  | p13c53_cyp71b14_ntc# |
| 4 | 2 | 4 | 10 | p13c54_cyp71b16_ntc# |
| 4 | 2 | 4 | 11 | p13c55_cyp71b18_ntc# |
| 4 | 2 | 4 | 12 | p13c56_cyp71b20_ntc# |
| 4 | 2 | 5 | 1  | p13c41_cyp71b37_ntc# |
| 4 | 2 | 5 | 2  | p13c42_cyp71b3_ntc#1 |
| 4 | 2 | 5 | 3  | p13c43_cyp71b5_ntc#1 |
| 4 | 2 | 5 | 4  | p13c44_cyp71b7_ntc#1 |
| 4 | 2 | 5 | 5  | p13c45_cyp71b9_ntc#1 |
| 4 | 2 | 5 | 6  | p13c46_cyp721a1_ntc# |
| 4 | 2 | 5 | 7  | p13c47_cyp724a1_ntc# |
| 4 | 2 | 5 | 8  | p13c48_cyp72a11_ntc# |
| 4 | 2 | 5 | 9  | p13c33_cyp76c6_ntc#1 |
| 4 | 2 | 5 | 10 | p13c34_cyp76g1_ntc#1 |
| 4 | 2 | 5 | 11 | p13c35_cyp77a6_ntc#1 |
| 4 | 2 | 5 | 12 | p13c36_cyp77a9_ntc#1 |
| 4 | 2 | 6 | 1  | p13c37_cyp78a10_ntc# |
| 4 | 2 | 6 | 2  | p13c38_cyp78a6_ntc#1 |
| 4 | 2 | 6 | 3  | p13c39_cyp78a8_ntc#1 |
| 4 | 2 | 6 | 4  | p13c40_cyp79a2_ntc#1 |
| 4 | 2 | 6 | 5  | p13c25_cyp81f3_ntc#1 |
| 4 | 2 | 6 | 6  | p13c26_cyp81g1_ntc#1 |
| 4 | 2 | 6 | 7  | p13c27_cyp81k1_ntc#1 |
| 4 | 2 | 6 | 8  | p13c28_cyp82c2_ntc#1 |
| 4 | 2 | 6 | 9  | p13c29_cyp82c4_ntc#1 |
| 4 | 2 | 6 | 10 | p13c30_cyp82g1_ntc#1 |
| 4 | 2 | 6 | 11 | p13c31_cyp83b1_ntc#1 |
| 4 | 2 | 6 | 12 | p13c32_cyp85_ntc#1   |

|   |   |    |    |                      |
|---|---|----|----|----------------------|
| 4 | 2 | 7  | 1  | p13c17_cyp89a4_ntc#1 |
| 4 | 2 | 7  | 2  | p13c18_cyp89a6_ntc#1 |
| 4 | 2 | 7  | 3  | p13c19_cyp89a9_ntc#1 |
| 4 | 2 | 7  | 4  | p13c20_cyp90b1_ntc#1 |
| 4 | 2 | 7  | 5  | p13c21_cyp90d1_ntc#1 |
| 4 | 2 | 7  | 6  | p13c22_cyp94b1_ntc#1 |
| 4 | 2 | 7  | 7  | p13c23_cyp94b3_ntc#1 |
| 4 | 2 | 7  | 8  | p13c24_cyp94d1_ntc#1 |
| 4 | 2 | 7  | 9  | p13c9_cyp98a3_ntc#1  |
| 4 | 2 | 7  | 10 | p13c10_cyp98a9_ntc#1 |
| 4 | 2 | 7  | 11 | p13c11_cytb5_2_ntc#1 |
| 4 | 2 | 7  | 12 | p13c12_cytb5_4_ntc#1 |
| 4 | 2 | 8  | 1  | p13c13_sbcyp71e1#1   |
| 4 | 2 | 8  | 2  | p13c14_ugt71b1_ntc#1 |
| 4 | 2 | 8  | 3  | p13c15_ugt71b5_ntc#1 |
| 4 | 2 | 8  | 4  | p13c16_ugt71b7_ntc#1 |
| 4 | 2 | 8  | 5  | p13c1_ugt73b1_ntc#1  |
| 4 | 2 | 8  | 6  | p13c2_ugt73b3_ntc#1  |
| 4 | 2 | 8  | 7  | p13c3_ugt73b5_ntc#1  |
| 4 | 2 | 8  | 8  | p13c4_ugt73c2_ntc#1  |
| 4 | 2 | 8  | 9  | p13c5_ugt73c4_ntc#1  |
| 4 | 2 | 8  | 10 | p13c6_ugt73c6_ntc#1  |
| 4 | 2 | 8  | 11 | p13c7_ugt73d1_ntc#1  |
| 4 | 2 | 8  | 12 | p13c8_ugt74c1_ntc#1  |
| 4 | 2 | 9  | 1  | p23c89_ugt76e12_ntc# |
| 4 | 2 | 9  | 2  | p23c90_ugt76e2_ntc#1 |
| 4 | 2 | 9  | 3  | p23c91_ugt76e4_ntc#1 |
| 4 | 2 | 9  | 4  | p23c92_ugt76e6_ntc#1 |
| 4 | 2 | 9  | 5  | p23c93_ugt76e9_ntc#1 |
| 4 | 2 | 9  | 6  | p23c94_gapdh         |
| 4 | 2 | 9  | 7  | p23c95_ugt76f2_ntc#1 |
| 4 | 2 | 9  | 8  | p23c96_ugt78d2_ntc#1 |
| 4 | 2 | 9  | 9  | p23c81_ugt84b1_ntc#1 |
| 4 | 2 | 9  | 10 | p23c82_ugt85a1_ntc#1 |
| 4 | 2 | 9  | 11 | p23c83_ugt85a3_ntc#1 |
| 4 | 2 | 9  | 12 | p23c84_ugt85a5_ntc#1 |
| 4 | 2 | 10 | 1  | p23c85_ugt86a1_ntc#1 |
| 4 | 2 | 10 | 2  | p23c86_ugt87a1_ntc#1 |
| 4 | 2 | 10 | 3  | p23c87_ugt88a1_ntc#1 |
| 4 | 2 | 10 | 4  | p23c88_ugt89b1_ntc#1 |
| 4 | 2 | 10 | 5  | p23c73_ugt91b1_ntc#1 |
| 4 | 2 | 10 | 6  | p23c74_ugt92a1_ntc#1 |
| 4 | 2 | 10 | 7  | p23c75_Blank14       |
| 4 | 2 | 10 | 8  | p23c76_Blank16       |
| 4 | 2 | 10 | 9  | p23c77_Blank18       |
| 4 | 2 | 10 | 10 | p23c78_Blank20       |
| 4 | 2 | 10 | 11 | p23c79_Blank22       |
| 4 | 2 | 10 | 12 | p23c80_Blank24       |
