# Supplementary material
Source: PubMed Central journal article supplement (PMC545087)
Supplement: pnas_102_5_1779__5.pdf [file pnas_102_5_1779__5.pdf]

| Array            | Gene ID          | False Discovery Rate |                   | fold | sd                                    | n    | annotation                                  |
|------------------|------------------|----------------------|-------------------|------|---------------------------------------|------|---------------------------------------------|
|                  |                  | Median (%)           | 90 percentile (%) |      |                                       |      |                                             |
| Focused array 1X | aad23027         | 23.6                 | 63.8              | 1.18 | 0.10                                  | 4    | putative tyrosine aminotransferase          |
|                  | UGT71b5          |                      |                   | 1.15 | 0.05                                  | 4    | glycosyltransferase; unknown function       |
|                  | aab70035         |                      |                   | 1.15 | 0.07                                  | 4    | putative chloroplast prephenate dehydratase |
|                  | CYP703A2         |                      |                   | 1.23 | 0.04                                  | 3    | cytochrome P450, unkown function            |
| Focused array 2X | sbCYP71E1        | 2.3                  | 11.7              | 1.86 | 0.23                                  | 4    | sorghum transgene                           |
|                  | CYP85A2          |                      |                   | 1.44 | 0.18                                  | 4    | cytochrome P450, unknown function           |
|                  | sbUGT85B1        |                      |                   | 1.31 | 0.12                                  | 4    | sorghum transgene                           |
|                  | aaf23561         |                      |                   | 1.36 | 0.19                                  | 4    | chalcone synthase                           |
|                  | aag37061         |                      |                   | 1.44 | 0.13                                  | 3    | superroot1, C-S lyase                       |
|                  | aad23027         |                      |                   | 1.47 | 0.36                                  | 4    | putative tyrosine aminotransferase          |
|                  | caa73905         |                      |                   | 1.31 | 0.23                                  | 4    | JR3 protein                                 |
|                  | CYP86B2          |                      |                   | 1.23 | 0.11                                  | 4    | cytochrome P450, unkown function            |
|                  | CYP78A5          | 2.3                  | 11.7              | 1.43 | 0.05                                  | 4    | cytochrome P450, unkown function            |
|                  | CYP89A9          |                      |                   | 1.50 | 0.15                                  | 4    | cytochrome P450, unkown function            |
|                  | CYP704A1         |                      |                   | 1.26 | 0.03                                  | 4    | cytochrome P450, unkown function            |
|                  | CYP77B1          |                      |                   | 1.28 | 0.04                                  | 4    | cytochrome P450, unkown function            |
|                  | UGT85A7          |                      |                   | 1.34 | 0.13                                  | 4    | glycosyltransferase; unknown function       |
|                  | UGT76E9          |                      |                   | 1.32 | 0.12                                  | 4    | glycosyltransferase; unknown function       |
|                  | CYP96A11         |                      |                   | 1.28 | 0.10                                  | 4    | cytochrome P450, unkown function            |
|                  | cytb5_6          |                      |                   | 1.23 | 0.06                                  | 4    | cytochrome B5                               |
|                  | CYP71A26         |                      |                   | 1.23 | 0.07                                  | 4    | cytochrome P450, unkown function            |
|                  | CYP708A2         |                      |                   | 1.27 | 0.11                                  | 4    | cytochrome P450, unkown function            |
|                  | CYP71B17         |                      |                   | 1.32 | 0.19                                  | 4    | cytochrome P450, unkown function            |
|                  | CYP71A27         |                      |                   | 1.32 | 0.18                                  | 4    | cytochrome P450, unkown function            |
|                  | CYP82C3          |                      |                   | 1.33 | 0.11                                  | 3    | cytochrome P450, unkown function            |
|                  | UGT73C6          |                      |                   | 1.26 | 0.15                                  | 4    | glycosyltransferase; unknown function       |
|                  | UGT76C1          |                      |                   | 1.15 | 0.02                                  | 4    | glycosyltransferase; unknown function       |
|                  | UGT86A2          |                      |                   | 1.24 | 0.15                                  | 4    | glycosyltransferase; unknown function       |
|                  | CYP71B4          |                      |                   | 1.19 | 0.10                                  | 4    | cytochrome P450, unkown function            |
|                  | UGT71B5          |                      |                   | 1.18 | 0.08                                  | 4    | glycosyltransferase; unknown function       |
|                  | UGT75D1          |                      |                   | 1.17 | 0.07                                  | 4    | glycosyltransferase; unknown function       |
|                  | UGT76C3          |                      |                   | 1.20 | 0.11                                  | 4    | glycosyltransferase; unknown function       |
|                  | UGT71B6          |                      |                   | 1.16 | 0.06                                  | 4    | glycosyltransferase; unknown function       |
|                  | CYP710A3         |                      |                   | 1.15 | 0.04                                  | 4    | cytochrome P450, unkown function            |
|                  | UGT91B1          |                      |                   | 1.15 | 0.04                                  | 4    | glycosyltransferase; unknown function       |
|                  | UGT73C5          | 1.20                 | 0.11              | 4    | glycosyltransferase; unknown function |      |                                             |
|                  | Focused array 3X | CYP85A2              | 10.2              | 20.5 | 3.41                                  | 0.19 | 4                                           |
| sbCYP71E1        |                  | 3.96                 |                   |      | 0.62                                  | 4    | sorghum transgene                           |
| CYP706A1         |                  | 2.02                 |                   |      | 0.16                                  | 4    | cytochrome P450; unknown function           |
| sbUGT85B1        |                  | 2.79                 |                   |      | 0.41                                  | 3    | sorghum transgene                           |
| CYP87A2          |                  | 1.28                 |                   |      | 0.10                                  | 4    | cytochrome P450; unknown function           |

|                        |           |    |    |      |      |   |                                                       |
|------------------------|-----------|----|----|------|------|---|-------------------------------------------------------|
|                        | CYP706A5  |    |    | 1.29 | 0.15 | 4 | cytochrome P450; unknown function                     |
|                        | CYP83A1   |    |    | 1.23 | 0.08 | 4 | cytochrome P450; glucosinolate pathway                |
|                        | UGT86A1   |    |    | 1.35 | 0.33 | 4 | glycosyltransferase; unknown function                 |
|                        | sbCYP79A1 |    |    | 1.22 | 0.15 | 4 | sorghum transgene                                     |
| <b>Global array 3X</b> | At1g01710 | 20 | 80 | 1.37 | 0.20 | 6 | acyl CoA thioesterase-related protein                 |
|                        | At5g65610 |    |    | 1.58 | 0.42 | 6 | unknown protein                                       |
|                        | At1g69700 |    |    | 1.42 | 0.28 | 6 | AtHVA22c protein                                      |
|                        | At2g34420 | 20 | 80 | 1.56 | 0.13 | 6 | photosystem II type I chlorophyll a/b binding protein |
|                        | At2g35605 |    |    | 1.32 | 0.09 | 6 | unknown protein                                       |
