# Supplementary material
Source: PubMed Central journal article supplement (PMC545087)

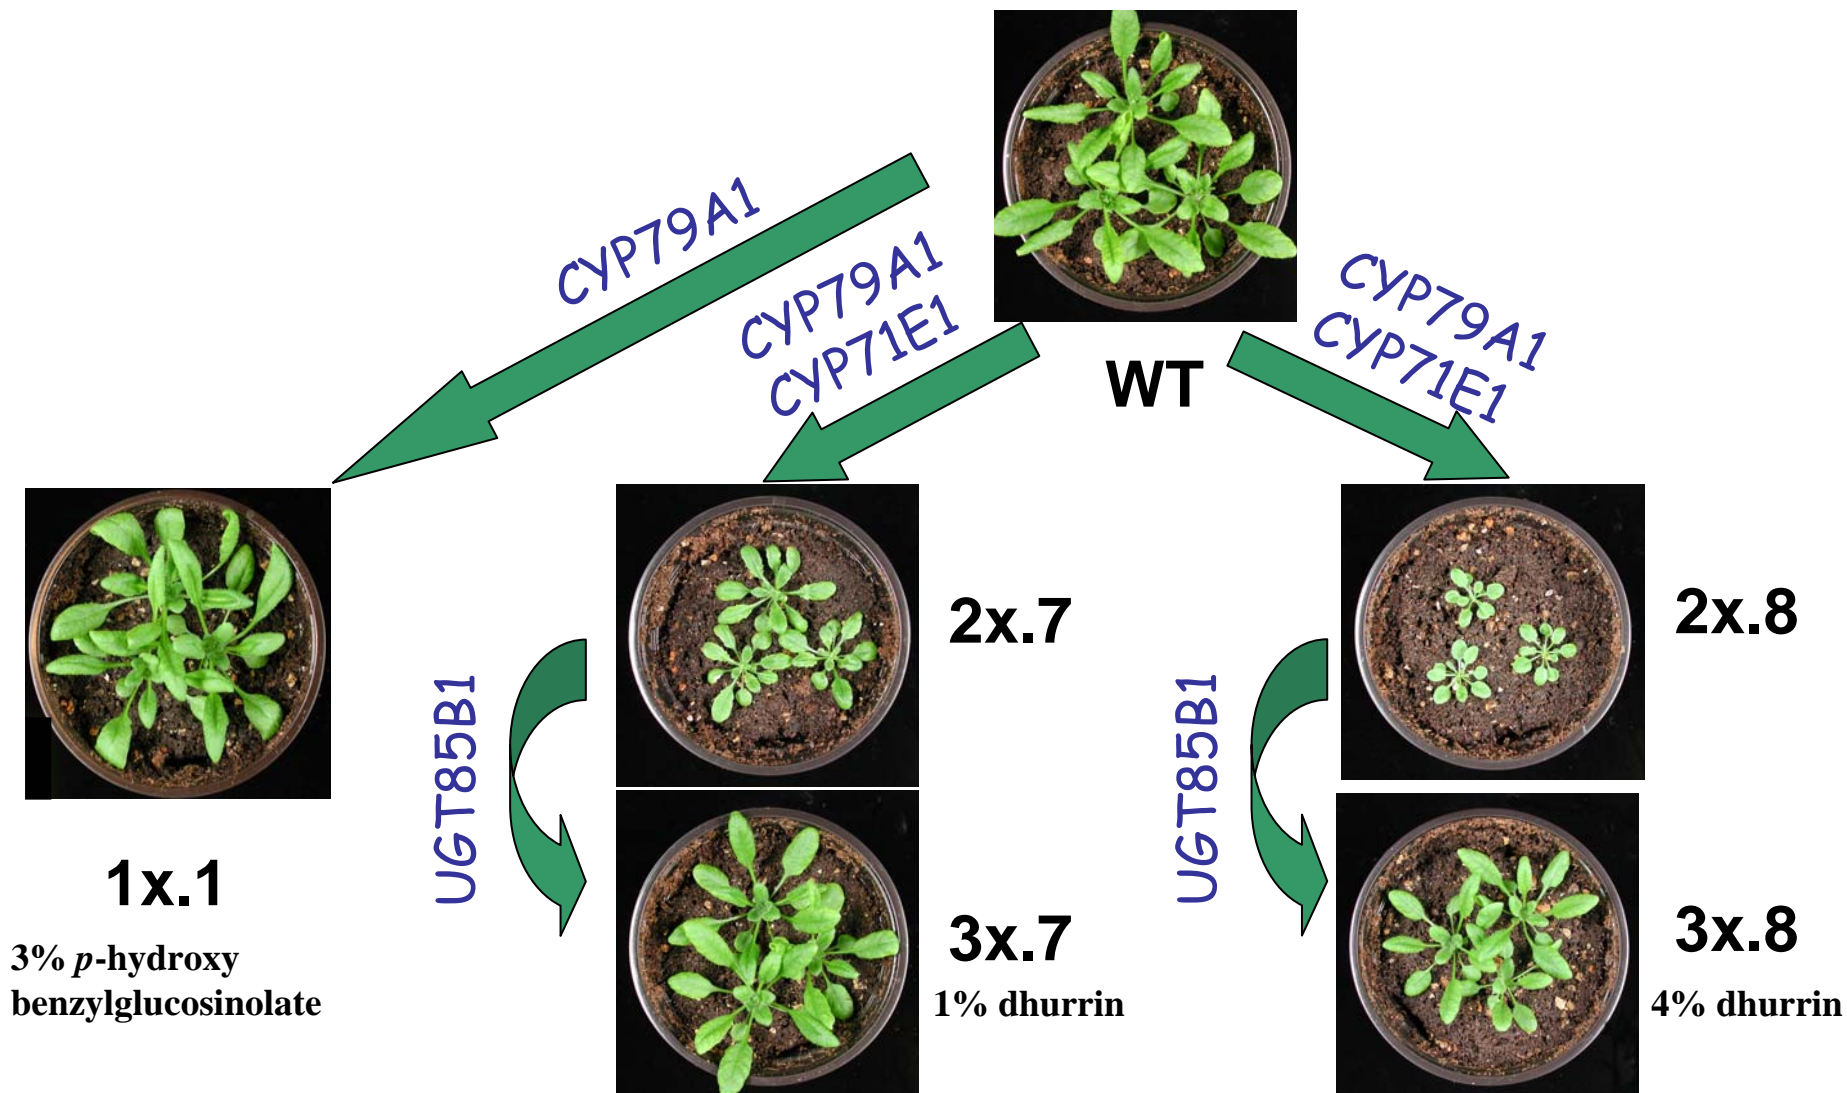

Supplement: pnas_102_5_1779__2.pdf [file pnas_102_5_1779__2.pdf]

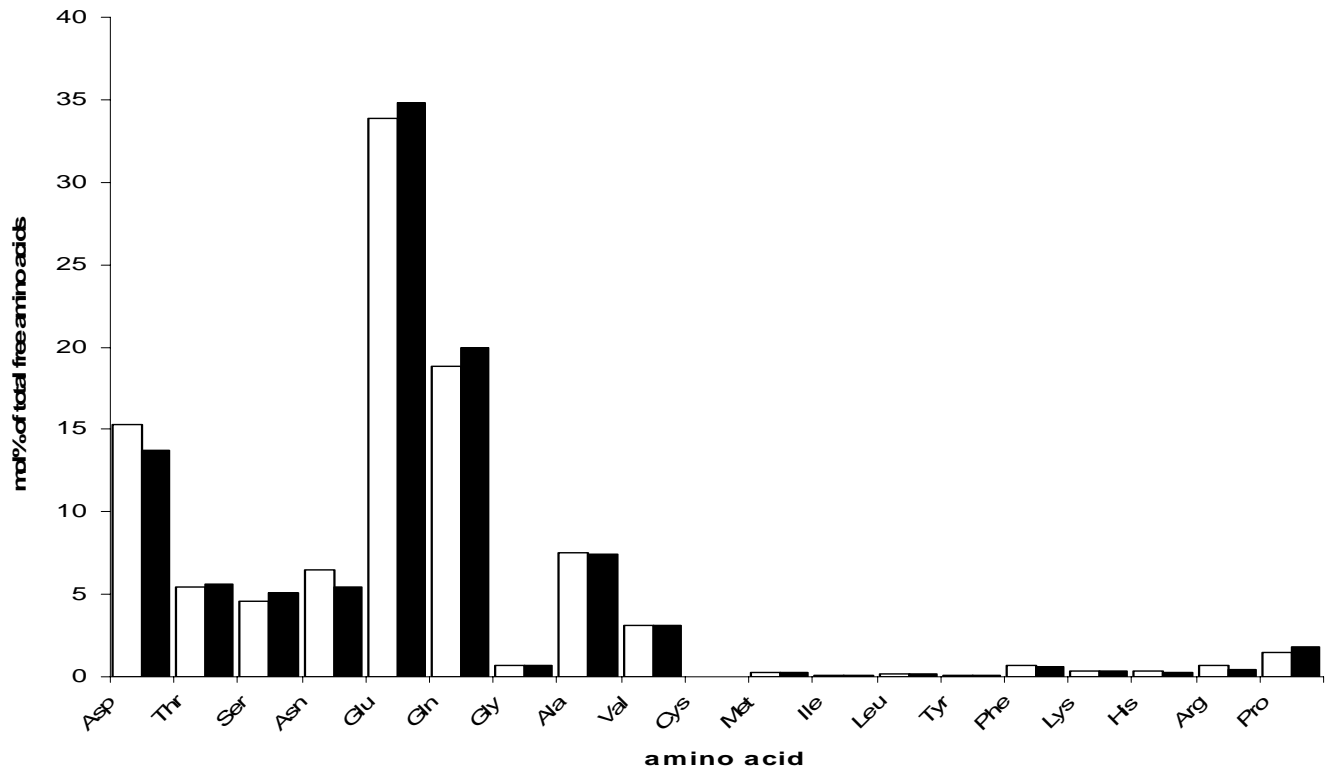

Supplement: pnas_102_5_1779__3.pdf [file pnas_102_5_1779__3.pdf]

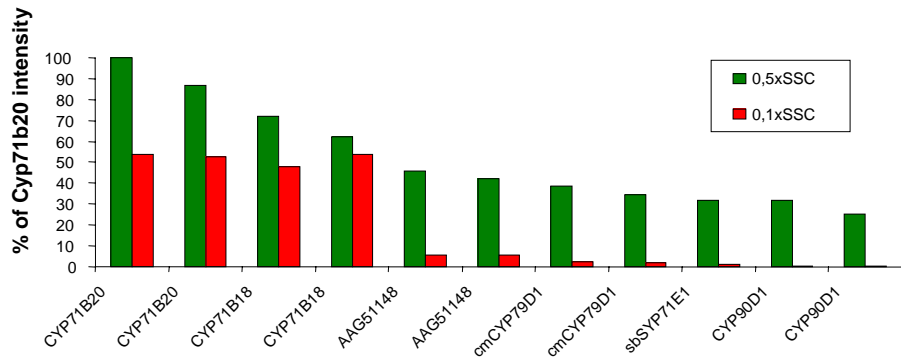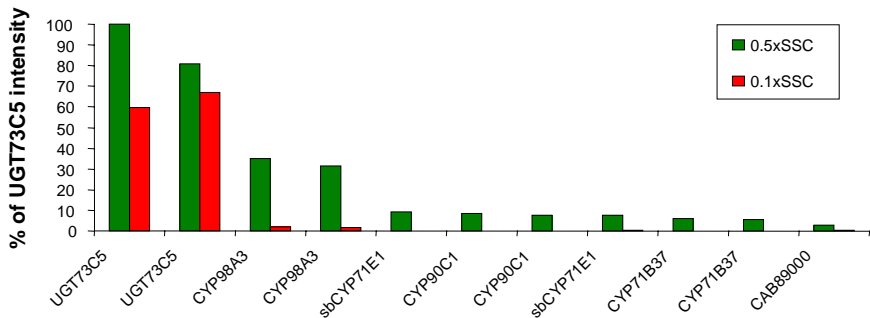

Supplement: pnas_102_5_1779__4.pdf [file pnas_102_5_1779__4.pdf]
